# Supplementary material
Source: publisher figshare collection journal article supplement (https://springernature.figshare.com/ndownloader/files/14002694)

**Figure S2.** Species richness in the guts of *G. mellonella* larvae feeding on artificial food with (blue line) and without (red line) antibiotics. The rarefaction curve shows the rate of increase in the number of species that are discovered as more reads are being sequenced. More different bacterial strains were identified in the guts of *G. mellonella* feeding on artificial food with oxytetracycline than in the guts of larvae not exposed to the antibiotic.

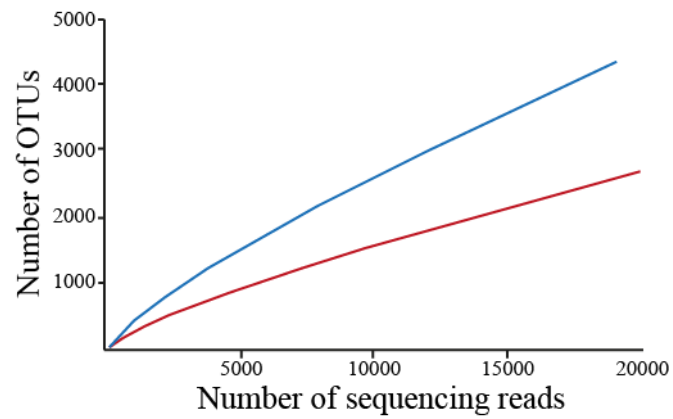

Supplement: Supplementary file [file 14002694]
